# Supplementary material
Source: HighWire-hosted journal article supplement (https://jnm.snmjournals.org/highwire/filestream/95470/field_highwire_adjunct_files/0/219501_Supplemental_Data.pdf)

### Supplemental Figure 1: Quality Assessment of Diagnostic Accuracy Studies

(QUADAS)-2 evaluation for risk of bias (A) and risk of applicability (B) for the 41 studies that were included in the analysis. Red = high risk of bias, Yellow – unclear risk of bias, and Green = low risk of bias.

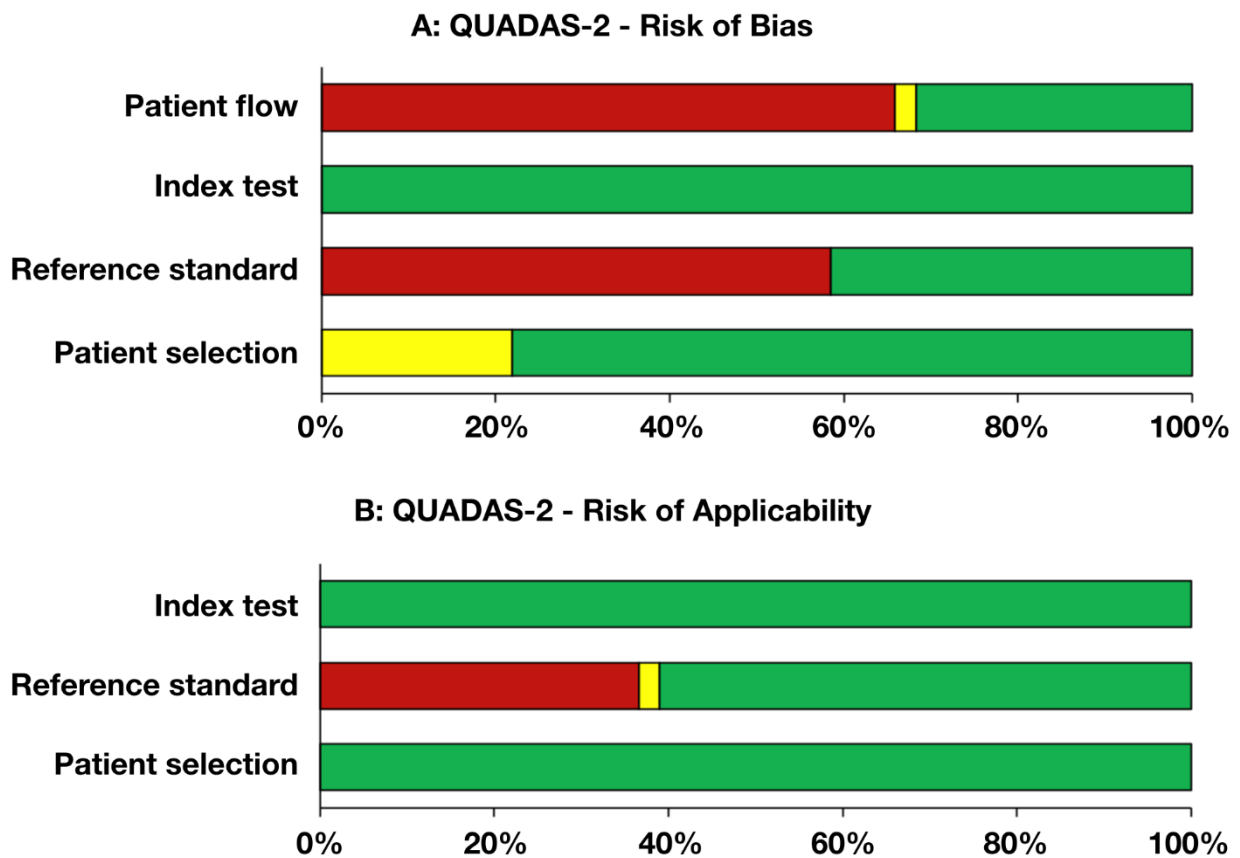

Supplement: 219501_Supplemental_Data.pdf [file 219501_Supplemental_Data.pdf]
